# Supplementary material for: A comparative study of two aldehyde dehydrogenases from Sphingobium sp.: the substrate spectrum and catalytic mechanism
Source: Royal Society of Chemistry journal article supplement (doi:10.1039/d3ob01937c), 2024-01-01
Supplement: d3ob01937c1.pdf [file d3ob01937c1.pdf]

*Supplementary Information*

**A Comparative Study of Two Aldehyde Dehydrogenases from  
*Sphinobium* sp.: Substrate Spectrum and Catalytic Mechanism**

*Siyi Chen, Jieyu Zhou\*, Xiangyuan Gu, Ye Ni\**

Key laboratory of industrial Biotechnology, Ministry of Education, School of Biotechnology,

Jiangnan University, Wuxi 214122, Jiangsu, China

## Contents

|                                                                                                      |     |
|------------------------------------------------------------------------------------------------------|-----|
| Table S1. Molar absorbance coefficient ( $\epsilon$ ) at different pH conditions. ....               | S3  |
| Table S2-S3. Coupling reaction between ALDHs and <i>Sp</i> NOX. ....                                 | S4  |
| Table S4. Biocatalytic oxidation of aromatic aldehydes to carboxylic acids catalysed by ALDHs. ....  | S5  |
| Figure S1. Molar absorbance coefficient ( $\epsilon$ ) at different pH conditions. ....              | S6  |
| Figure S2. Phylogenetic analysis of <i>Sp</i> ALDH1, <i>Sp</i> ALDH2 and other bacterial ALDHs. .... | S7  |
| Figure S3. HPLC analysis of syringaldehyde conversions by purified ALDHs. ....                       | S8  |
| Figure S4. Catalytic mechanism of ALDHs toward aldehyde substrates. ....                             | S9  |
| Figure S5. Molecular docking of <i>Sp</i> ALDH1 with pyridine-formaldehydes. ....                    | S10 |
| Figure S6. Preparation of syringic acid by coupling ALDHs with <i>Sp</i> NOX.....                    | S11 |
| Figure S7. Coupled reaction catalyzed by ALDHs and <i>Sp</i> NOX.....                                | S12 |

Number of Pages: 12

Number of Figures: 7

Number of Tables: 4

**Table S1.** Molar absorbance coefficient ( $\epsilon$ ) at different pH conditions.

|                                                           | pH   | equation             | R <sup>2</sup> | $\epsilon(\mu\text{L} \cdot \mu\text{mol}^{-1} \cdot \text{cm}^{-1})$ |
|-----------------------------------------------------------|------|----------------------|----------------|-----------------------------------------------------------------------|
| citric acid/sodium citrate buffer<br>(pH 5.0-6.5, 100 mM) | 5.0  | $y = 0.790x + 0.029$ | 0.984          | 1.271                                                                 |
|                                                           | 5.5  | $y = 0.784x + 0.028$ | 0.990          | 1.260                                                                 |
|                                                           | 6.0  | $y = 0.948x + 0.034$ | 0.983          | 1.524                                                                 |
|                                                           | 6.5  | $y = 1.666x + 0.028$ | 0.985          | 2.679                                                                 |
| phosphate buffer (pH 6.0-8.0, 50 mM)                      | 6.0  | $y = 1.110x + 0.024$ | 0.982          | 1.785                                                                 |
|                                                           | 6.5  | $y = 2.140x - 0.001$ | 0.984          | 3.441                                                                 |
|                                                           | 7.0  | $y = 4.886x - 0.066$ | 0.994          | 7.856                                                                 |
|                                                           | 7.5  | $y = 6.113x + 0.006$ | 0.993          | 9.828                                                                 |
|                                                           | 8.0  | $y = 7.140x + 0.025$ | 0.999          | 11.479                                                                |
| Tris-HCl (pH 7.0-9.0, 50 mM)                              | 7.0  | $y = 6.311x - 0.107$ | 0.992          | 10.146                                                                |
|                                                           | 7.5  | $y = 5.883x + 0.057$ | 0.995          | 9.458                                                                 |
|                                                           | 8.0  | $y = 6.377x + 0.065$ | 0.998          | 10.252                                                                |
|                                                           | 8.5  | $y = 6.933x + 0.094$ | 0.998          | 11.147                                                                |
|                                                           | 9.0  | $y = 8.001x + 0.054$ | 0.999          | 12.863                                                                |
| Glycine-NaOH (pH 8.5-11.0, 50 mM)                         | 8.7  | $y = 7.890x + 0.039$ | 0.998          | 12.685                                                                |
|                                                           | 9.0  | $y = 8.022x + 0.036$ | 0.998          | 12.897                                                                |
|                                                           | 9.6  | $y = 7.206x + 0.070$ | 0.999          | 11.586                                                                |
|                                                           | 10.5 | $y = 7.310x + 0.094$ | 0.999          | 11.753                                                                |
|                                                           | 11.0 | $y = 7.115x + 0.142$ | 0.999          | 11.439                                                                |
|                                                           | 11.5 | $y = 6.905x + 0.210$ | 0.999          | 11.102                                                                |

**Table S2.** Coupling reaction between ALDHs and NOX (600µl reaction system (35°C))

|                                                   | Final concentration |
|---------------------------------------------------|---------------------|
| 1a                                                | 20 mM               |
| NAD <sup>+</sup>                                  | 0.5 mM              |
| NOX                                               | 0.5 mg/mL           |
| <i>Sp</i> ALDH1/ <i>Sp</i> ALDH2                  | 0.1 mg/mL           |
| Citric acid/sodium citrate buffer (100mM, pH 6.5) | /                   |
| /Tris-HCl (100mM, pH 8.0)                         | /                   |

**Table S3.** Coupling reaction between ALDHs and NOX (600µl reaction system (35°C))

|                                                   | Final concentration |
|---------------------------------------------------|---------------------|
| 1a                                                | 20 mM               |
| NAD <sup>+</sup>                                  | 0.5 mM              |
| NOX                                               | 1.5 mg/mL           |
| <i>Sp</i> ALDH1/ <i>Sp</i> ALDH2                  | 0.3 mg/mL           |
| Citric acid/sodium citrate buffer (100mM, pH 6.5) | /                   |
| /Tris-HCl (100mM, pH 8.0)                         | /                   |

**Table S4.** Biocatalytic oxidation of aromatic aldehydes to carboxylic acids catalyzed by ALDHs.

| Substrate                                                                                         | ALDH            | Conv. [%] | Substrate                                                                                         | ALDH            | Conv. [%] |
|---------------------------------------------------------------------------------------------------|-----------------|-----------|---------------------------------------------------------------------------------------------------|-----------------|-----------|
| <b>1a</b><br>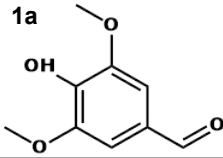    | <i>Sp</i> ALDH1 | > 99      | <b>2a</b><br>   | <i>Sp</i> ALDH1 | > 99      |
|                                                                                                   | <i>Sp</i> ALDH2 | > 99      |                                                                                                   | <i>Sp</i> ALDH2 | > 99      |
| <b>3a</b><br>    | <i>Sp</i> ALDH1 | > 99      | <b>4a</b><br>   | <i>Sp</i> ALDH1 | 3.2       |
|                                                                                                   | <i>Sp</i> ALDH2 | > 99      |                                                                                                   | <i>Sp</i> ALDH2 | > 99      |
| <b>5a</b><br>    | <i>Sp</i> ALDH1 | > 99      | <b>6a</b><br>   | <i>Sp</i> ALDH1 | 5.3       |
|                                                                                                   | <i>Sp</i> ALDH2 | > 99      |                                                                                                   | <i>Sp</i> ALDH2 | > 99      |
| <b>7a</b><br>    | <i>Sp</i> ALDH1 | > 99      | <b>8a</b><br>   | <i>Sp</i> ALDH1 | > 99      |
|                                                                                                   | <i>Sp</i> ALDH2 | > 99      |                                                                                                   | <i>Sp</i> ALDH2 | > 99      |
| <b>9a</b><br>   | <i>Sp</i> ALDH1 | > 99      | <b>10a</b><br> | <i>Sp</i> ALDH1 | > 99      |
|                                                                                                   | <i>Sp</i> ALDH2 | > 99      |                                                                                                   | <i>Sp</i> ALDH2 | > 99      |
| <b>11a</b><br> | <i>Sp</i> ALDH1 | > 99      |                                                                                                   |                 |           |
|                                                                                                   | <i>Sp</i> ALDH2 | > 99      |                                                                                                   |                 |           |

Experimental: 600  $\mu$ L in buffer, T = 35  $^{\circ}$ C, 100 rpm, [substrate] = 5 mM, [ALDH] = 0.2 mg/mL, [NAD<sup>+</sup>] = 10 mM. Citrate buffer (100 mM, pH 6.5) was used to test *Sp*ALDH1, while glycine-NaOH buffer (50 mM, pH 10.5) was employed for *Sp*ALDH2. Conversions were measured by HPLC.

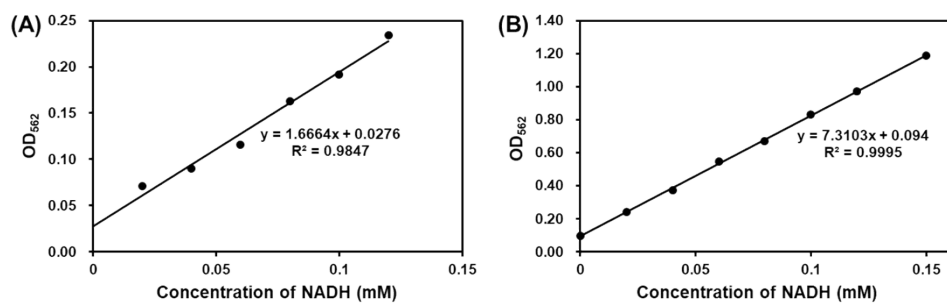

**Fig S1.** Molar absorbance coefficient ( $\epsilon$ ) at different pH conditions. (A) Citric acid/sodium citrate buffer (pH 6.5, 100 mM); (B) Glycine-NaOH (pH 10.5, 50 mM).

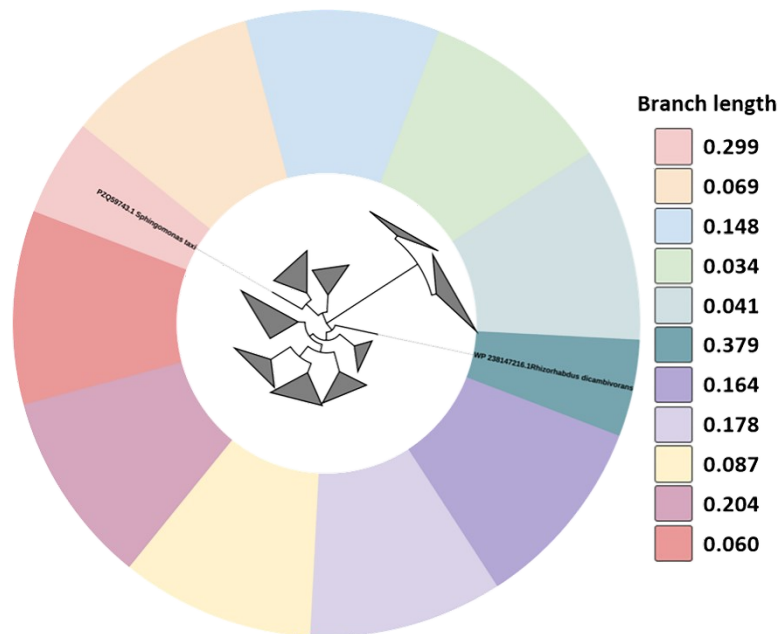

**Fig. S2** Phylogenetic analysis of *SpALDH1*, *SpALDH2* and other bacterial ALDHs. Use differences in branch lengths as a basis for coloring. Auto collapse clade is set to be 0.5.

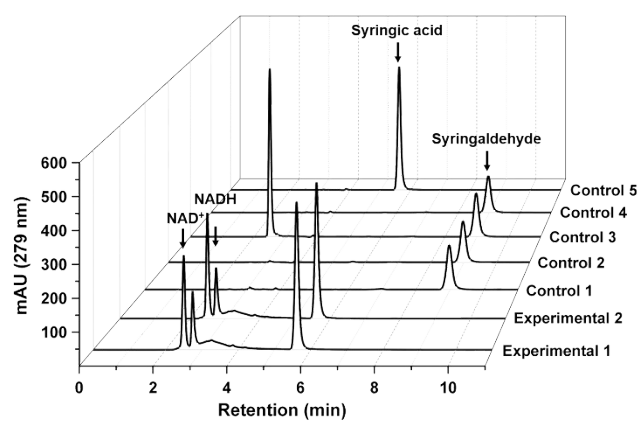

|                | <i>Sp</i> ALDH1 | <i>Sp</i> ALDH2 | NAD <sup>+</sup> | Syringaldehyde | Syringic acid | Buffer |
|----------------|-----------------|-----------------|------------------|----------------|---------------|--------|
| Experimental 1 | +               | -               | +                | +              | -             | +      |
| Experimental 2 | -               | +               | +                | +              | -             | +      |
| Control 1      | +               | -               | -                | +              | -             | +      |
| Control 2      | -               | +               | -                | +              | -             | +      |
| Control 3      | -               | -               | +                | +              | -             | +      |
| Control 4      | -               | -               | -                | +              | -             | +      |
| Control 5      | -               | -               | -                | -              | +             | +      |

**Fig. S3** HPLC analysis of syringaldehyde conversions by purified ALDHs. Controlled experiments of ALDHs biocatalyzed oxidation of syringaldehyde.



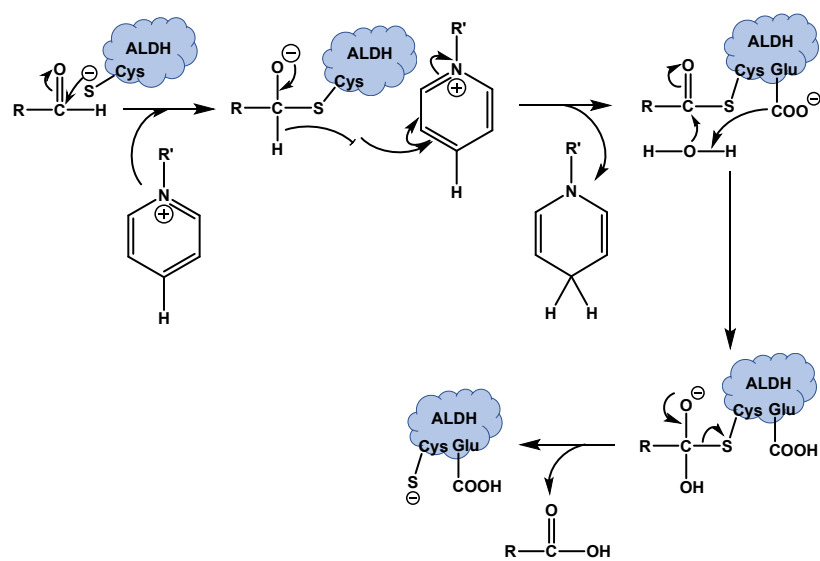

**Fig S4.** Catalytic mechanism of ALDHs toward aldehyde substrates.

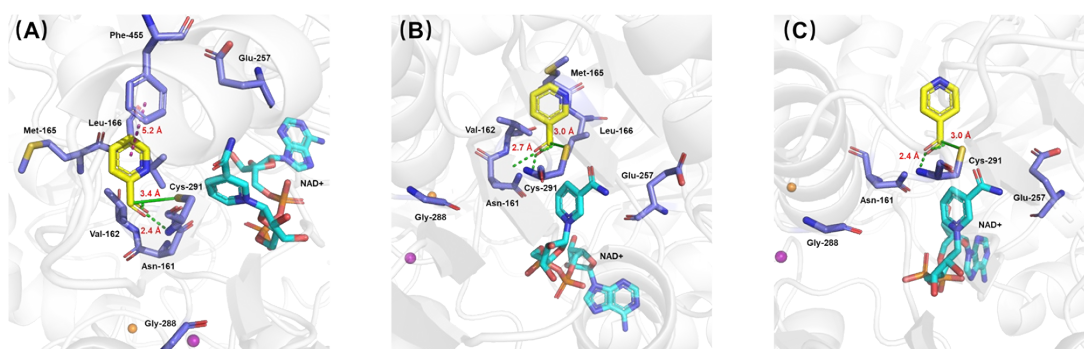

**Fig S5.** Molecular docking of *Sp*ALDH1 with pyridine-formaldehydes. (A) 22a; (B) 23a; (C) 24a. Active site residues, substrates and NAD<sup>+</sup> cofactor are showed as sticks, represented by slate (carbon atom), yellow (carbon atom) and cyan (carbon atom), respectively. The ALDHs are depicted as grey. Oxygen atoms (red); Nitrogen atoms (blue); Sulfur atoms (yellow orange); Potassium ions (purple ball); Sodium ions (orange ball). The hydrogen bonds are showed as green dotted lines; the pi-pi stacking interactions are showed as light magenta dotted lines.

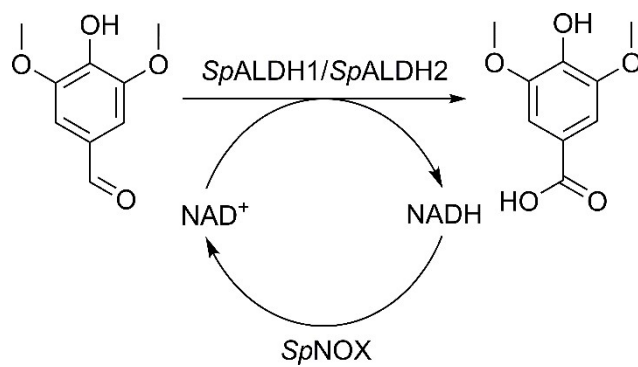

**Fig. S6** Preparation of syringic acid by coupling ALDHs with *Sp*NOX.

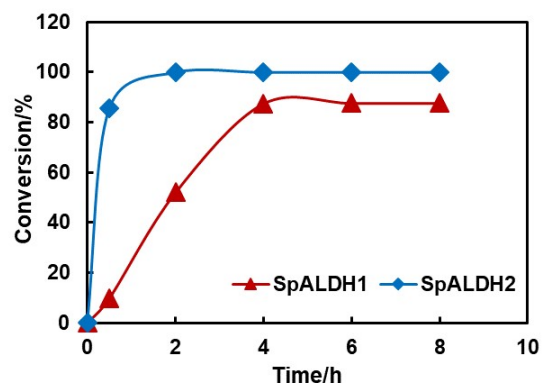

Fig S7. Coupled reaction catalyzed by ALDHs and NOX at substrate **1a** concentration of 20 mM.
